# Supplementary material for: The 24-h FEV1 time profile of olodaterol once daily via Respimat® and formoterol twice daily via Aerolizer® in patients with GOLD 2–4 COPD: results from two 6-week crossover studies
Source: PubMed Central journal article supplement (PMC4152473; doi:10.1186/2193-1801-3-419), 2014-08-09
Supplement: 40064_2014_1159_MOESM1_ESM.pdf [file 40064_2014_1159_MOESM1_ESM.pdf]

## Additional file 1

**Table S1 IRBs**

| Study 1222.24                                                                  |                                |                                      |                             |                            |
|--------------------------------------------------------------------------------|--------------------------------|--------------------------------------|-----------------------------|----------------------------|
| IRB<br>(name/address)                                                          | IRB Chairperson                | Centre number(s)/<br>Investigator(s) | Protocol/Amendments         | Date of final approval     |
| Schulman Associates, IRB,<br>4290 Glendale–Milford Rd,<br>Cincinnati, OH 45242 | Sharon Nelson, MSN, RN,<br>CNS | 24002<br>Jonathan A Bernstein, MD    | 1222.24 and<br>Amendment 01 | 05/May/2009<br>25/Aug/2009 |
| Schulman Associates, IRB,<br>4290 Glendale–Milford Rd,<br>Cincinnati, OH 45242 | Sharon Nelson, MSN, RN,<br>CNS | 24003<br>Joseph Boscia III, MD, CPI  | 1222.24 and<br>Amendment 01 | 29/Apr/2009<br>25/Aug/2009 |

|                                                                                |                                |                                      |                             |                            |
|--------------------------------------------------------------------------------|--------------------------------|--------------------------------------|-----------------------------|----------------------------|
| Schulman Associates, IRB,<br>4290 Glendale–Milford Rd,<br>Cincinnati, OH 45242 | Sharon Nelson, MSN, RN,<br>CNS | 24006<br>David R. Erb, MD            | 1222.24 and<br>Amendment 01 | 29/Apr/2009<br>25/Aug/2009 |
| Schulman Associates, IRB,<br>4290 Glendale–Milford Rd,<br>Cincinnati, OH 45242 | Sharon Nelson, MSN, RN,<br>CNS | 24001<br>Gregory J. Feldman, MD, CPI | 1222.24 and<br>Amendment 01 | 04/May/2009<br>25/Aug/2009 |
| Schulman Associates, IRB,<br>4290 Glendale–Milford Rd,<br>Cincinnati, OH 45242 | Sharon Nelson, MSN, RN,<br>CNS | 24009<br>Steven G. Hull, MD          | 1222.24 and<br>Amendment 01 | 29/Apr/2009<br>25/Aug/2009 |
| Schulman Associates, IRB,<br>4290 Glendale–Milford Rd,<br>Cincinnati, OH 45242 | Sharon Nelson, MSN, RN,<br>CNS | 24010<br>Norman K. Imes, MD          | 1222.24 and<br>Amendment 01 | 04/Jun/2009<br>25/Aug/2009 |

|                                                                                |                                |                                           |                                 |                                |
|--------------------------------------------------------------------------------|--------------------------------|-------------------------------------------|---------------------------------|--------------------------------|
| Schulman Associates, IRB,<br>4290 Glendale–Milford Rd,<br>Cincinnati, OH 45242 | Sharon Nelson, MSN, RN,<br>CNS | 24004<br><br>Andras Koser, MD, MBA, CCPI  | 1222.24 and<br><br>Amendment 01 | 30/Apr/2009<br><br>25/Aug/2009 |
| Schulman Associates, IRB,<br>4290 Glendale–Milford Rd,<br>Cincinnati, OH 45242 | Sharon Nelson, MSN, RN,<br>CNS | 24011<br><br>Lon D. Lynn, DO              | 1222.24 and<br><br>Amendment 01 | 30/Apr/2009<br><br>25/Aug/2009 |
| Schulman Associates, IRB,<br>4290 Glendale–Milford Rd,<br>Cincinnati, OH 45242 | Sharon Nelson, MSN, RN,<br>CNS | 24008<br><br>Krishna Kumar Pudi, MD       | 1222.24 and<br><br>Amendment 01 | 29/Apr/2009<br><br>25/Aug/2009 |
| Schulman Associates, IRB,<br>4290 Glendale–Milford Rd,<br>Cincinnati, OH 45242 | Sharon Nelson, MSN, RN,<br>CNS | 24007<br><br>Jose Angel Santiago, Jr., MD | 1222.24 and<br><br>Amendment 01 | 29/Apr/2009<br><br>25/Aug/2009 |

|                                                                                |                                |                               |                             |                            |
|--------------------------------------------------------------------------------|--------------------------------|-------------------------------|-----------------------------|----------------------------|
| Schulman Associates, IRB,<br>4290 Glendale–Milford Rd,<br>Cincinnati, OH 45242 | Sharon Nelson, MSN, RN,<br>CNS | 24005<br>Robert Walker, MD    | 1222.24 and<br>Amendment 01 | 30/Apr/2009<br>25/Aug/2009 |
| Study 1222.25                                                                  |                                |                               |                             |                            |
| Schulman Associates, IRB,<br>4290 Glendale–Milford Rd,<br>Cincinnati, OH 45242 | Sharon Nelson, MSN, RN,<br>CNS | 24014<br>Maxwell L. Axler, MD | 1222.25 and<br>Amendment 01 | 29/Apr/2009<br>Not needed  |
| Schulman Associates, IRB,<br>4290 Glendale–Milford Rd,<br>Cincinnati, OH 45242 | Sharon Nelson, MSN, RN,<br>CNS | 24005<br>Ravi T. Chandran, MD | 1222.25 and<br>Amendment 01 | 13/May/2009<br>Not needed  |
| Schulman Associates, IRB,<br>4290 Glendale–Milford Rd,<br>Cincinnati, OH 45242 | Sharon Nelson, MSN, RN,<br>CNS | 25002<br>Leonard Jay Dunn, MD | 1222.25 and<br>Amendment 01 | 29/Apr/2009<br>26/Aug/2009 |

|                                                                                |                                |                                                       |                             |                            |
|--------------------------------------------------------------------------------|--------------------------------|-------------------------------------------------------|-----------------------------|----------------------------|
| Schulman Associates, IRB,<br>4290 Glendale–Milford Rd,<br>Cincinnati, OH 45242 | Sharon Nelson, MSN, RN,<br>CNS | 25007<br>Faisal A. Fakh, MD                           | 1222.25 and<br>Amendment 01 | 29/Apr/2009<br>25/Aug/2009 |
| Schulman Associates, IRB,<br>4290 Glendale–Milford Rd,<br>Cincinnati, OH 45242 | Sharon Nelson, MSN, RN,<br>CNS | 25008<br>Walter B. Forman, MD<br>Martin J. Conway, MD | 1222.25 and<br>Amendment 01 | 15/May/2009<br>25/Aug/2009 |
| Schulman Associates, IRB,<br>4290 Glendale–Milford Rd,<br>Cincinnati, OH 45242 | Sharon Nelson, MSN, RN,<br>CNS | 25013<br>Glenn M. Giessel, MD                         | 1222.25 and<br>Amendment 01 | 26/Apr/2009<br>25/Aug/2009 |
| Schulman Associates, IRB,<br>4290 Glendale–Milford Rd,<br>Cincinnati, OH 45242 | Sharon Nelson, MSN, RN,<br>CNS | 25003<br>John M. Hill, MD                             | 1222.25 and<br>Amendment 01 | 29/Apr/2009<br>25/Aug/2009 |

|                                                                                |                                |                                   |                                 |                                |
|--------------------------------------------------------------------------------|--------------------------------|-----------------------------------|---------------------------------|--------------------------------|
| Schulman Associates, IRB,<br>4290 Glendale–Milford Rd,<br>Cincinnati, OH 45242 | Sharon Nelson, MSN, RN,<br>CNS | 25004<br><br>Craig F. LaForce, MD | 1222.25 and<br><br>Amendment 01 | 04/May/2009<br><br>25/Aug/2009 |
| Schulman Associates, IRB,<br>4290 Glendale–Milford Rd,<br>Cincinnati, OH 45242 | Sharon Nelson, MSN, RN,<br>CNS | 25011<br><br>Charles A. Pue, MD   | 1222.25 and<br><br>Amendment 01 | 01/Jun/2009<br><br>25/Aug/2009 |
| Schulman Associates, IRB,<br>4290 Glendale–Milford Rd,<br>Cincinnati, OH 45242 | Sharon Nelson, MSN, RN,<br>CNS | 25010<br><br>Stuart J. Simon, MD  | 1222.25 and<br><br>Amendment 01 | 22/May/2009<br><br>25/Aug/2009 |
| Crescent City, IRB,<br>2820 Canal Street,<br>New Orleans, LA 70119             | Brandon M. Wool, MD            | 25006<br><br>William B. Smith, MD | 1222.25 and<br><br>Amendment 01 | 08/May/2009<br><br>28/Aug/2009 |

|                                                                                |                                |       |                            |                             |                            |
|--------------------------------------------------------------------------------|--------------------------------|-------|----------------------------|-----------------------------|----------------------------|
| Schulman Associates, IRB,<br>4290 Glendale–Milford Rd,<br>Cincinnati, OH 45242 | Sharon Nelson, MSN, RN,<br>CNS | 25012 | Selwyn Spangenthal, MD     | 1222.25 and<br>Amendment 01 | 05/May/2009<br>25/Aug/2009 |
| Schulman Associates, IRB,<br>4290 Glendale–Milford Rd,<br>Cincinnati, OH 45242 | Sharon Nelson, MSN, RN,<br>CNS | 25009 | Jan Hendrick Westerman, MD | 1222.25 and<br>Amendment 01 | 01/May/2009<br>25/Aug/2009 |

---

IRB = Institutional Review Board.

**Table S2 Secondary efficacy end point FVC AUC<sub>0-12</sub> response (L) treatment comparisons after 6 weeks**

| FVC AUC <sub>0-12</sub> | Treatment |                    | Adjusted <sup>a</sup> mean (95% CI) difference from placebo at 6 weeks |                |              |
|-------------------------|-----------|--------------------|------------------------------------------------------------------------|----------------|--------------|
|                         | n         | Adjusted mean (SE) | Mean (SE)                                                              | <i>P</i> value | 95% CI       |
| Study 1222.24           |           |                    |                                                                        |                |              |
| Placebo                 | 93        | -0.086 (0.036)     |                                                                        |                |              |
| Olodaterol 5 µg QD      | 92        | 0.139 (0.036)      | 0.226 (0.030)                                                          | < .0001        | 0.167, 0.284 |
| Olodaterol 10 µg QD     | 91        | 0.142 (0.036)      | 0.229 (0.030)                                                          | < .0001        | 0.170, 0.287 |
| Formoterol 12 µg BID    | 90        | 0.117 (0.036)      | 0.203 (0.030)                                                          | < .0001        | 0.144, 0.262 |
| Study 1222.25           |           |                    |                                                                        |                |              |
| Placebo                 | 91        | -0.032 (0.040)     |                                                                        |                |              |
| Olodaterol 5 µg QD      | 92        | 0.219 (0.040)      | 0.251 (0.028)                                                          | < .0001        | 0.195, 0.306 |
| Olodaterol 10 µg QD     | 90        | 0.214 (0.040)      | 0.246 (0.028)                                                          | < .0001        | 0.190, 0.302 |
| Formoterol 12 µg BID    | 90        | 0.203 (0.040)      | 0.235 (0.028)                                                          | < .0001        | 0.179, 0.291 |



BID = twice daily; FVC = forced vital capacity;  $AUC_{0-12}$  = area under the curve from 0 to 12 h; QD = once daily; SE = standard error.

<sup>a</sup>Adjusted for baseline and period.

**Table S3 Secondary efficacy end point FVC AUC<sub>12-24</sub> response (L) treatment comparisons after 6 weeks**

| FVC AUC <sub>12-24</sub> | Treatment |                    | Adjusted <sup>a</sup> mean (95% CI) difference from placebo at 6 weeks |                |              |
|--------------------------|-----------|--------------------|------------------------------------------------------------------------|----------------|--------------|
|                          | n         | Adjusted mean (SE) | Mean (SE)                                                              | <i>P</i> value | 95% CI       |
| Study 1222.24            |           |                    |                                                                        |                |              |
| Placebo                  | 93        | -0.164 (0.036)     |                                                                        |                |              |
| Olodaterol 5 µg QD       | 92        | -0.016 (0.037)     | 0.147 (0.030)                                                          | < .0001        | 0.087, 0.207 |
| Olodaterol 10 µg QD      | 91        | 0.008 (0.037)      | 0.171 (0.030)                                                          | < .0001        | 0.112, 0.231 |
| Formoterol 12 µg BID     | 90        | 0.088 (0.037)      | 0.251 (0.030)                                                          | < .0001        | 0.191, 0.311 |
| Study 1222.25            |           |                    |                                                                        |                |              |
| Placebo                  | 91        | -0.078 (0.041)     |                                                                        |                |              |
| Olodaterol 5 µg QD       | 92        | 0.083 (0.041)      | 0.161 (0.031)                                                          | < .0001        | 0.101, 0.222 |
| Olodaterol 10 µg QD      | 90        | 0.079 (0.041)      | 0.157 (0.031)                                                          | < .0001        | 0.096, 0.218 |
| Formoterol 12 µg BID     | 90        | 0.144 (0.041)      | 0.223 (0.031)                                                          | < .0001        | 0.162, 0.284 |

BID = twice daily; FVC = forced vital capacity;  $AUC_{12-24}$  = area under the curve from 12 to 24 h; QD = once daily; SE = standard error.

<sup>a</sup>Adjusted for baseline and period.

**Table S4 Secondary efficacy end point FVC AUC<sub>0-24</sub> response (L) treatment comparisons after 6 weeks**

| FVC AUC <sub>0-24</sub> | Treatment |                    | Adjusted <sup>a</sup> mean (95% CI) difference from placebo at 6 weeks |                |              |
|-------------------------|-----------|--------------------|------------------------------------------------------------------------|----------------|--------------|
|                         | n         | Adjusted mean (SE) | Mean (SE)                                                              | <i>P</i> value | 95% CI       |
| Study 1222.24           |           |                    |                                                                        |                |              |
| Placebo                 | 93        | -0.125 (0.035)     |                                                                        |                |              |
| Olodaterol 5 µg QD      | 92        | 0.061 (0.035)      | 0.186 (0.028)                                                          | <.0001         | 0.132, 0.241 |
| Olodaterol 10 µg QD     | 91        | 0.075 (0.035)      | 0.200 (0.028)                                                          | <.0001         | 0.145, 0.254 |
| Formoterol 12 µg BID    | 90        | 0.102 (0.035)      | 0.227 (0.028)                                                          | <.0001         | 0.172, 0.282 |
| Study 1222.25           |           |                    |                                                                        |                |              |
| Placebo                 | 91        | -0.055 (0.039)     |                                                                        |                |              |
| Olodaterol 5 µg QD      | 92        | 0.151 (0.039)      | 0.206 (0.026)                                                          | <.0001         | 0.155, 0.258 |
| Olodaterol 10 µg QD     | 90        | 0.147 (0.039)      | 0.202 (0.027)                                                          | <.0001         | 0.150, 0.255 |
| Formoterol 12 µg BID    | 90        | 0.174 (0.039)      | 0.229 (0.027)                                                          | <.0001         | 0.176, 0.281 |

BID = twice daily; FVC = forced vital capacity;  $AUC_{0-24}$  = area under the curve from 0 to 24 h; QD = once daily; SE = standard error.

<sup>a</sup>Adjusted for baseline and period.

**Table S5 Secondary efficacy end point FVC peak response (L) and comparisons to placebo after 6 weeks**

| FVC peak             | Treatment |                    | Adjusted mean (95% CI) difference from placebo at 6 weeks |                |              |
|----------------------|-----------|--------------------|-----------------------------------------------------------|----------------|--------------|
|                      | n         | Adjusted mean (SE) | Mean (SE)                                                 | <i>P</i> value | 95% CI       |
| Study 1222.24        |           |                    |                                                           |                |              |
| Placebo              | 93        | 0.107 (0.038)      |                                                           |                |              |
| Olodaterol 5 µg QD   | 92        | 0.368 (0.039)      | 0.261 (0.035)                                             | <.0001         | 0.191, 0.330 |
| Olodaterol 10 µg QD  | 91        | 0.360 (0.039)      | 0.252 (0.036)                                             | <.0001         | 0.183, 0.322 |
| Formoterol 12 µg BID | 90        | 0.410 (0.039)      | 0.302 (0.036)                                             | <.0001         | 0.232, 0.372 |
| Study 1222.25        |           |                    |                                                           |                |              |
| Placebo              | 91        | 0.138 (0.043)      |                                                           |                |              |
| Olodaterol 5 µg QD   | 92        | 0.436 (0.043)      | 0.299 (0.034)                                             | <.0001         | 0.233, 0.365 |
| Olodaterol 10 µg QD  | 90        | 0.440 (0.043)      | 0.302 (0.034)                                             | <.0001         | 0.236, 0.369 |
| Formoterol 12 µg BID | 90        | 0.475 (0.043)      | 0.338 (0.034)                                             | <.0001         | 0.271, 0.405 |

BID = twice daily; FVC = forced vital capacity; QD = once daily; SE = standard error.

<sup>a</sup>Adjusted for baseline and period.

**Table S6 Secondary efficacy end point trough FVC response (L) treatment comparisons after 6 weeks**

| Trough FVC           | Treatment |                    | Adjusted <sup>a</sup> mean (95% CI) difference from placebo at 6 weeks |                |              |
|----------------------|-----------|--------------------|------------------------------------------------------------------------|----------------|--------------|
|                      | n         | Adjusted mean (SE) | Mean (SE)                                                              | <i>P</i> value | 95% CI       |
| Study 1222.24        |           |                    |                                                                        |                |              |
| Placebo              | 93        | -0.117 (0.039)     |                                                                        |                |              |
| Olodaterol 5 µg QD   | 92        | 0.037 (0.040)      | 0.154 (0.034)                                                          | <.0001         | 0.087, 0.221 |
| Olodaterol 10 µg QD  | 91        | 0.037 (0.040)      | 0.154 (0.034)                                                          | <.0001         | 0.086, 0.221 |
| Formoterol 12 µg BID | 90        | 0.066 (0.040)      | 0.183 (0.034)                                                          | <.0001         | 0.115, 0.250 |
| Study 1222.25        |           |                    |                                                                        |                |              |
| Placebo              | 91        | -0.007 (0.053)     |                                                                        |                |              |
| Olodaterol 5 µg QD   | 92        | 0.125 (0.053)      | 0.132 (0.055)                                                          | .0163          | 0.024, 0.239 |
| Olodaterol 10 µg QD  | 90        | 0.133 (0.054)      | 0.139 (0.055)                                                          | .0118          | 0.031, 0.247 |
| Formoterol 12 µg BID | 90        | 0.141 (0.054)      | 0.148 (0.055)                                                          | .0076          | 0.040, 0.256 |



BID = twice daily; FVC = forced vital capacity; QD = once daily; SE = standard error.

<sup>a</sup>Adjusted for baseline and period.

**Table S7 AEs (pooled data)**

| AE                                   | Placebo<br>(n = 190) | Olodaterol 5 µg<br>(n = 188) | Olodaterol 10 µg<br>(n = 187) | Formoterol 12 µg<br>(n = 186) |
|--------------------------------------|----------------------|------------------------------|-------------------------------|-------------------------------|
| Investigator-defined drug-related AE | 2 (1.1)              | 5 (2.7)                      | 5 (2.7)                       | 4 (2.2)                       |
| Serious AEs                          | 7 (3.7)              | 7 (3.7)                      | 5 (2.7)                       | 5 (2.7)                       |
| Fatal                                | 0                    | 1 (0.5)                      | 1 (0.5)                       | 0                             |
| Immediately life-threatening         | 0                    | 1 (0.5)                      | 1 (0.5)                       | 1 (0.5)                       |
| Incapacitating                       | 0                    | 0                            | 0                             | 0                             |
| Requiring hospitalization            | 6 (3.2)              | 5 (2.7)                      | 4 (2.1)                       | 4 (2.2)                       |
| Prolonging hospitalization           | 0                    | 0                            | 0                             | 0                             |
| Other                                | 1 (0.5)              | 1 (0.5)                      | 0                             | 0                             |

AE = adverse event; COPD = chronic obstructive pulmonary disease.
